# Supplementary material for: Dietary and Sexual Correlates of Gut Microbiota in the Japanese Gecko, Gekko japonicus (Schlegel, 1836)
Source: MDPI journal article supplement (doi:10.3390/ani13081365), 2023-04-16
Supplement: s1 [file s1]

## Supplementary Figure and Tables

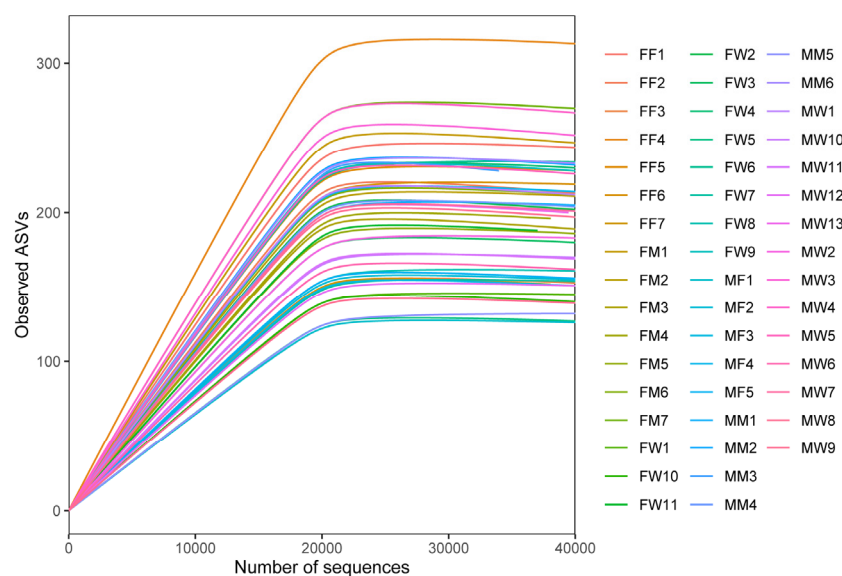

**Figure S1.** Rarefaction curves based on ASVs for individual fecal samples. Each color represents a sample.

**Table S1.** The number of valid reads and sequence information for each fecal sample.

| Sample ID | Group | Raw reads | High-quality reads | Average sequence length | Minimum sequence length | Maximum sequence length | Accession number |
|-----------|-------|-----------|--------------------|-------------------------|-------------------------|-------------------------|------------------|
| FF1       | FF    | 73684     | 40053              | 406.59                  | 258                     | 422                     | SAMC798099       |
| FF2       | FF    | 88949     | 60703              | 406.61                  | 257                     | 422                     | SAMC798104       |
| FF3       | FF    | 90123     | 51799              | 408.68                  | 395                     | 422                     | SAMC798108       |
| FF4       | FF    | 94885     | 66593              | 407.10                  | 395                     | 422                     | SAMC798112       |
| FF5       | FF    | 88354     | 44352              | 406.84                  | 259                     | 422                     | SAMC798130       |
| FF6       | FF    | 87440     | 53660              | 407.19                  | 260                     | 422                     | SAMC798131       |
| FF7       | FF    | 73619     | 38059              | 411.72                  | 395                     | 422                     | SAMC798132       |
| FM1       | FM    | 75766     | 41882              | 405.6                   | 258                     | 422                     | SAMC798096       |
| FM2       | FM    | 102760    | 70196              | 408.12                  | 395                     | 422                     | SAMC798098       |
| FM3       | FM    | 72769     | 40632              | 409.31                  | 395                     | 422                     | SAMC798101       |
| FM4       | FM    | 67705     | 38056              | 408.60                  | 260                     | 422                     | SAMC798103       |
| FM5       | FM    | 74409     | 43685              | 403.84                  | 261                     | 422                     | SAMC798105       |
| FM6       | FM    | 72310     | 43249              | 409.58                  | 395                     | 422                     | SAMC798107       |
| FM7       | FM    | 81193     | 59389              | 407.66                  | 259                     | 422                     | SAMC798110       |
| FW1       | FW    | 112652    | 66225              | 406.46                  | 259                     | 422                     | SAMC798095       |
| FW2       | FW    | 86098     | 43304              | 409.95                  | 395                     | 422                     | SAMC798097       |
| FW3       | FW    | 76989     | 41571              | 411.82                  | 395                     | 422                     | SAMC798100       |
| FW4       | FW    | 84867     | 46340              | 404.12                  | 261                     | 422                     | SAMC798102       |
| FW5       | FW    | 69268     | 42933              | 409.83                  | 259                     | 422                     | SAMC798106       |
| FW6       | FW    | 150444    | 86689              | 401.75                  | 260                     | 422                     | SAMC798109       |
| FW7       | FW    | 92941     | 52980              | 408.74                  | 395                     | 422                     | SAMC798111       |
| FW8       | FW    | 86275     | 48301              | 409.68                  | 395                     | 422                     | SAMC798137       |
| FW9       | FW    | 82425     | 50606              | 407.51                  | 395                     | 422                     | SAMC798138       |
| FW10      | FW    | 81409     | 47539              | 411.59                  | 260                     | 422                     | SAMC798139       |
| FW11      | FW    | 72672     | 37028              | 408.33                  | 257                     | 422                     | SAMC798140       |
| MF1       | MF    | 77935     | 47389              | 408.57                  | 395                     | 421                     | SAMC798115       |
| MF2       | MF    | 82673     | 45365              | 410.01                  | 307                     | 422                     | SAMC798122       |
| MF3       | MF    | 93453     | 52888              | 406.79                  | 257                     | 422                     | SAMC798123       |

| Sample ID | Group | Raw reads | High-quality reads | Average sequence length | Minimum sequence length | Maximum sequence length | Accession number |
|-----------|-------|-----------|--------------------|-------------------------|-------------------------|-------------------------|------------------|
| MF4       | MF    | 92104     | 41266              | 401.99                  | 259                     | 422                     | SAMC798124       |
| MF5       | MF    | 90387     | 50096              | 411.24                  | 395                     | 422                     | SAMC798129       |
| MM1       | MM    | 82136     | 45335              | 408.02                  | 395                     | 422                     | SAMC798114       |
| MM2       | MM    | 104528    | 55091              | 410.22                  | 395                     | 422                     | SAMC798117       |
| MM3       | MM    | 92997     | 33970              | 408.92                  | 258                     | 422                     | SAMC798119       |
| MM4       | MM    | 96831     | 44585              | 411.18                  | 395                     | 422                     | SAMC798121       |
| MM5       | MM    | 94575     | 57840              | 407.83                  | 395                     | 421                     | SAMC798126       |
| MM6       | MM    | 88806     | 51696              | 408.94                  | 395                     | 422                     | SAMC798128       |
| MW1       | MW    | 98013     | 54728              | 407.02                  | 395                     | 422                     | SAMC798113       |
| MW2       | MW    | 86628     | 56998              | 403.80                  | 283                     | 422                     | SAMC798116       |
| MW3       | MW    | 97957     | 70420              | 405.41                  | 260                     | 422                     | SAMC798118       |
| MW4       | MW    | 90098     | 60973              | 406.60                  | 260                     | 423                     | SAMC798120       |
| MW5       | MW    | 96383     | 51194              | 405.50                  | 258                     | 422                     | SAMC798125       |
| MW6       | MW    | 90030     | 47425              | 413.33                  | 395                     | 422                     | SAMC798127       |
| MW7       | MW    | 95586     | 53061              | 408.23                  | 258                     | 422                     | SAMC798133       |
| MW8       | MW    | 71594     | 47456              | 408.50                  | 395                     | 422                     | SAMC798134       |
| MW9       | MW    | 89601     | 45778              | 406.39                  | 258                     | 422                     | SAMC798135       |
| MW10      | MW    | 90782     | 53788              | 406.60                  | 257                     | 422                     | SAMC798136       |
| MW11      | MW    | 89660     | 55005              | 407.86                  | 260                     | 422                     | SAMC798141       |
| MW12      | MW    | 93227     | 55424              | 406.95                  | 281                     | 422                     | SAMC798142       |
| MW13      | MW    | 73681     | 39467              | 410.10                  | 395                     | 422                     | SAMC798143       |

**Table S2.** The number of bacterial amplicon sequence variants (ASVs) at different taxonomic levels in each fecal sample.

| Sample ID | Group | ASVs | Genus | Family | Class | Order | Phylum |
|-----------|-------|------|-------|--------|-------|-------|--------|
| FF1       | FF    | 211  | 68    | 46     | 14    | 29    | 8      |
| FF2       | FF    | 189  | 78    | 52     | 15    | 34    | 10     |
| FF3       | FF    | 146  | 43    | 34     | 13    | 25    | 8      |
| FF4       | FF    | 197  | 84    | 52     | 15    | 35    | 10     |
| FF5       | FF    | 211  | 59    | 35     | 12    | 21    | 9      |
| FF6       | FF    | 173  | 61    | 41     | 14    | 29    | 8      |
| FF7       | FF    | 132  | 41    | 31     | 12    | 19    | 8      |
| FM1       | FM    | 213  | 71    | 43     | 11    | 24    | 7      |
| FM2       | FM    | 189  | 75    | 51     | 14    | 32    | 10     |
| FM3       | FM    | 179  | 52    | 36     | 12    | 23    | 7      |
| FM4       | FM    | 188  | 60    | 40     | 12    | 27    | 8      |
| FM5       | FM    | 162  | 49    | 38     | 12    | 23    | 7      |
| FM6       | FM    | 178  | 72    | 45     | 12    | 27    | 8      |
| FM7       | FM    | 197  | 80    | 49     | 14    | 31    | 10     |
| FW1       | FW    | 126  | 55    | 34     | 10    | 21    | 7      |
| FW2       | FW    | 179  | 50    | 37     | 12    | 24    | 8      |
| FW3       | FW    | 167  | 51    | 37     | 10    | 21    | 7      |
| FW4       | FW    | 191  | 59    | 37     | 12    | 25    | 8      |
| FW5       | FW    | 115  | 41    | 29     | 10    | 19    | 7      |
| FW6       | FW    | 206  | 56    | 38     | 13    | 26    | 8      |
| FW7       | FW    | 145  | 42    | 28     | 10    | 19    | 7      |
| FW8       | FW    | 147  | 41    | 28     | 10    | 18    | 7      |
| FW9       | FW    | 173  | 56    | 40     | 11    | 23    | 6      |
| FW10      | FW    | 114  | 35    | 32     | 12    | 22    | 7      |
| FW11      | FW    | 171  | 48    | 31     | 12    | 21    | 9      |
| MF1       | MF    | 122  | 35    | 30     | 12    | 22    | 8      |
| MF2       | MF    | 150  | 43    | 32     | 13    | 21    | 8      |
| MF3       | MF    | 142  | 45    | 33     | 12    | 22    | 8      |

| Sample ID | Group | ASVs | Genus | Family | Class | Order | Phylum |
|-----------|-------|------|-------|--------|-------|-------|--------|
| MF4       | MF    | 187  | 53    | 34     | 12    | 22    | 7      |
| MF5       | MF    | 149  | 43    | 32     | 11    | 19    | 8      |
| MM1       | MM    | 197  | 58    | 38     | 11    | 22    | 8      |
| MM2       | MM    | 212  | 56    | 37     | 11    | 22    | 6      |
| MM3       | MM    | 214  | 60    | 39     | 13    | 25    | 9      |
| MM4       | MM    | 186  | 46    | 31     | 13    | 21    | 8      |
| MM5       | MM    | 114  | 34    | 33     | 11    | 23    | 6      |
| MM6       | MM    | 210  | 58    | 44     | 12    | 27    | 7      |
| MW1       | MW    | 204  | 54    | 33     | 13    | 23    | 8      |
| MW2       | MW    | 134  | 52    | 40     | 11    | 28    | 7      |
| MW3       | MW    | 128  | 59    | 44     | 14    | 28    | 9      |
| MW4       | MW    | 183  | 77    | 47     | 13    | 30    | 9      |
| MW5       | MW    | 204  | 50    | 33     | 11    | 20    | 7      |
| MW6       | MW    | 147  | 36    | 24     | 11    | 16    | 7      |
| MW7       | MW    | 190  | 48    | 29     | 12    | 19    | 8      |
| MW8       | MW    | 117  | 39    | 28     | 12    | 19    | 8      |
| MW9       | MW    | 172  | 53    | 35     | 14    | 23    | 9      |
| MW10      | MW    | 161  | 48    | 31     | 12    | 20    | 8      |
| MW11      | MW    | 152  | 58    | 40     | 14    | 27    | 9      |
| MW12      | MW    | 135  | 44    | 26     | 10    | 18    | 7      |
| MW13      | MW    | 173  | 50    | 35     | 12    | 22    | 7      |

**Table S3.** The relative abundance of unique bacterial taxon among different groups based on the Kruskal–Wallis H test. The letters “f” and “g” indicate family and genus, respectively.

| Taxonomy                       | df | H     | p     |
|--------------------------------|----|-------|-------|
| f__Caulobacteraceae            | 5  | 11.76 | 0.04  |
| f__Desulfovibrionaceae         | 5  | 13.85 | 0.02  |
| f__Eggerthellaceae             | 5  | 17.08 | 0.004 |
| f__Erysipelatoclostridiaceae   | 5  | 11.23 | 0.05  |
| f__Marinifilaceae              | 5  | 13.23 | 0.02  |
| f__Tannerellaceae              | 5  | 10.51 | 0.06  |
| g__Bacteroides                 | 5  | 17.77 | 0.003 |
| g__Clostridium_sensu_stricto_1 | 5  | 14.60 | 0.01  |
| g__Desulfovibrio               | 5  | 16.18 | 0.006 |
| g__Eggerthella                 | 5  | 15.56 | 0.008 |
| g__Odoribacter                 | 5  | 13.62 | 0.02  |

**Table S4.** The relative abundance of unique predicated functions among different groups based on the Kruskal–Wallis H test.

| Level name                                              | df | H     | p     |
|---------------------------------------------------------|----|-------|-------|
| Metabolism Energy metabolism                            | 5  | 15.66 | 0.008 |
| Environmental Information Processing                    | 5  | 13.22 | 0.02  |
| Environmental Information Processing Membrane transport | 5  | 13.54 | 0.02  |
| Metabolism Biosynthesis of other secondary metabolites  | 5  | 12.35 | 0.03  |
| Metabolism Metabolism of cofactors and vitamins         | 5  | 12.03 | 0.03  |
| ko00010                                                 | 5  | 11.47 | 0.04  |
| ko00051                                                 | 5  | 11.26 | 0.05  |
| ko00340                                                 | 5  | 12.82 | 0.02  |
| ko00473                                                 | 5  | 11.90 | 0.04  |
| ko00720                                                 | 5  | 14.23 | 0.01  |
| ko00790                                                 | 5  | 12.88 | 0.02  |
| ko01055                                                 | 5  | 13.40 | 0.02  |
